# Supplementary material for: Intestinal Microbial Diversity of Free-Range and Captive Yak in Qinghai Province
Source: MDPI journal article supplement (doi:10.3390/microorganisms10040754), 2022-03-31
Supplement: s1 [file s1]

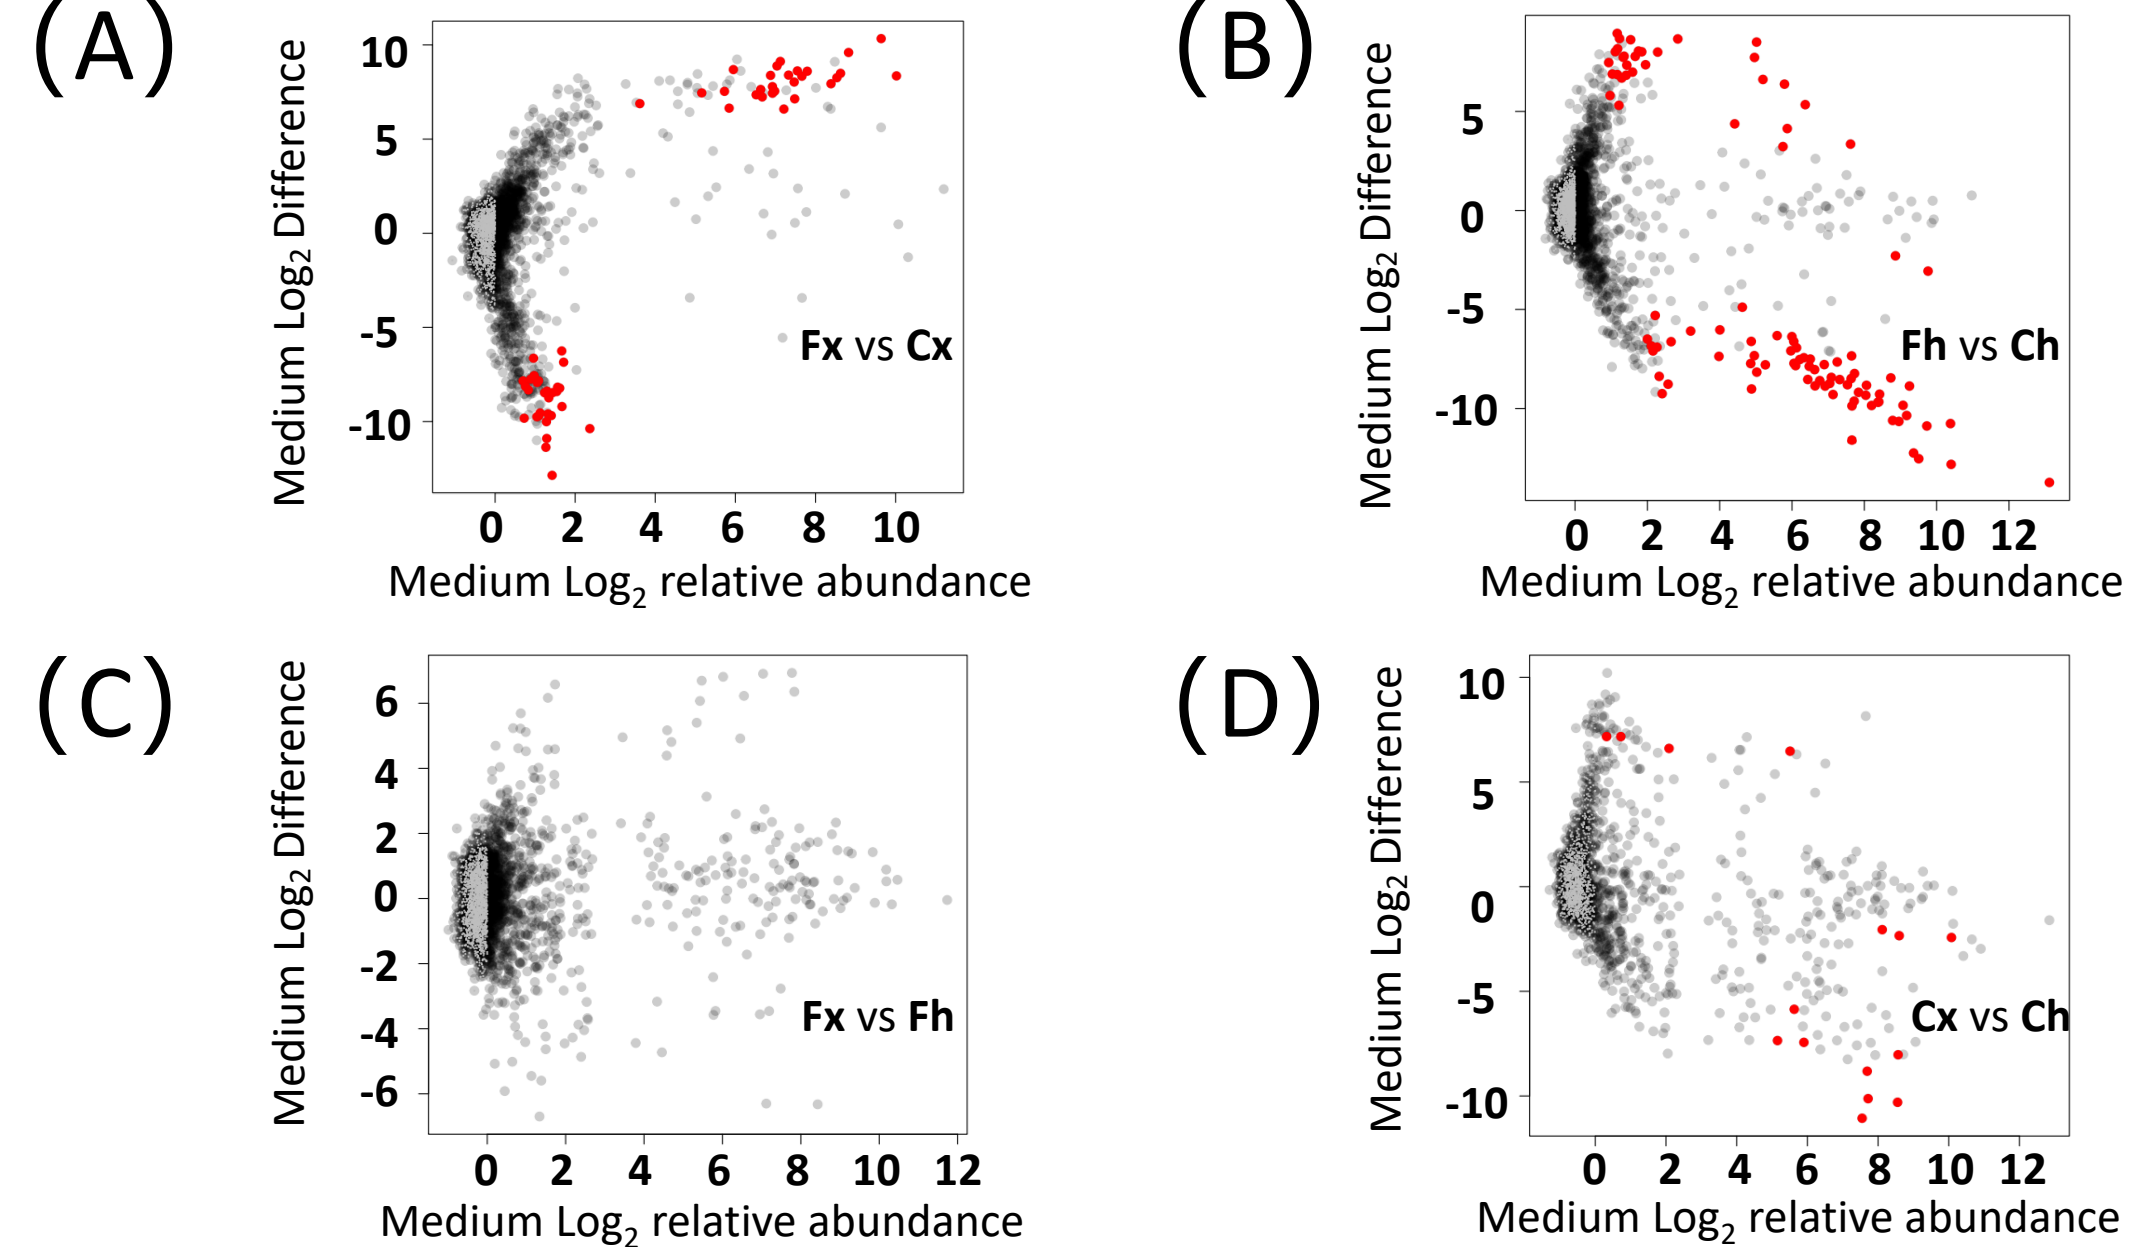

**Figure S1.** Differential abundance analysis using ADLE<sub>x</sub>2 method based on ASVs abundance. (A) Fx and Cx; (B) Fh and Ch; (C) Fx and Fh; (D) Cx and Ch. Red dots indicate ASVs with significant differences.

(A)

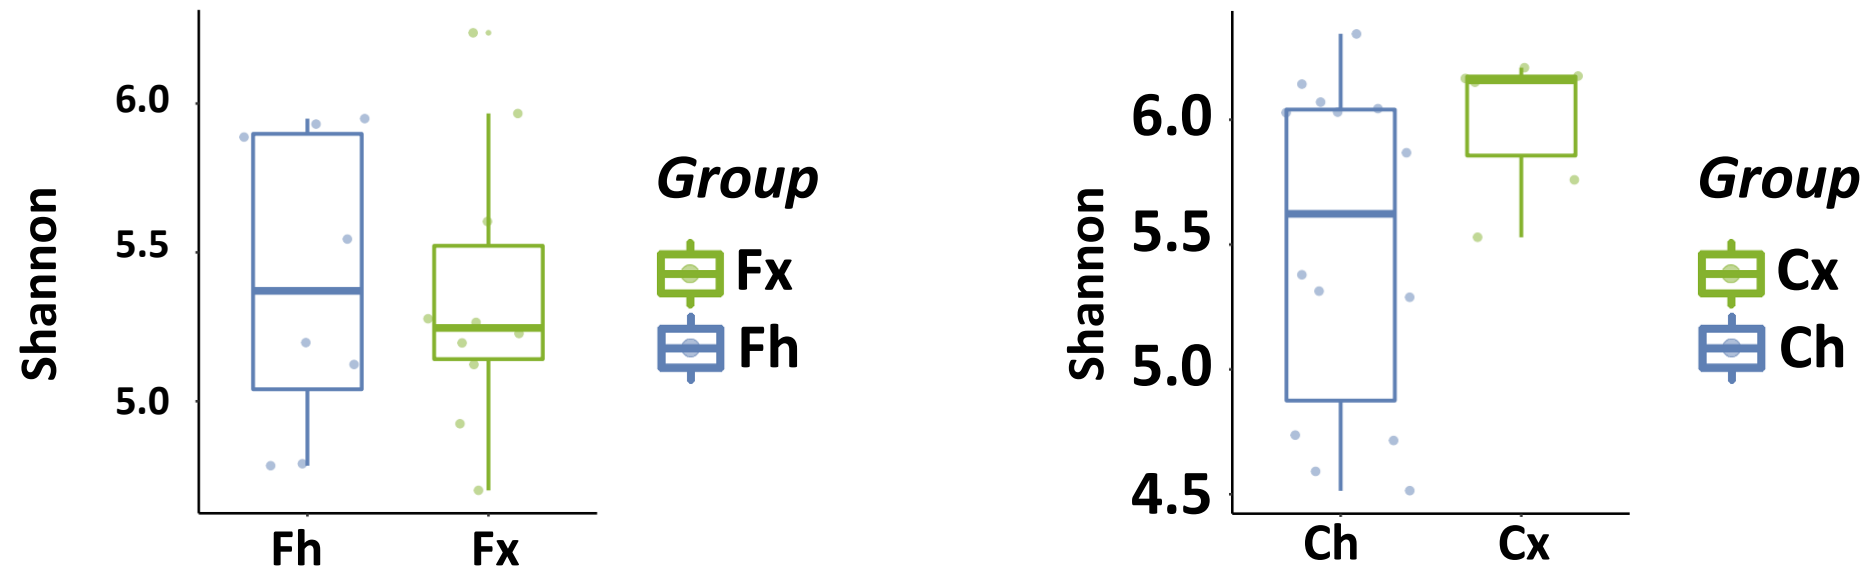

(B)

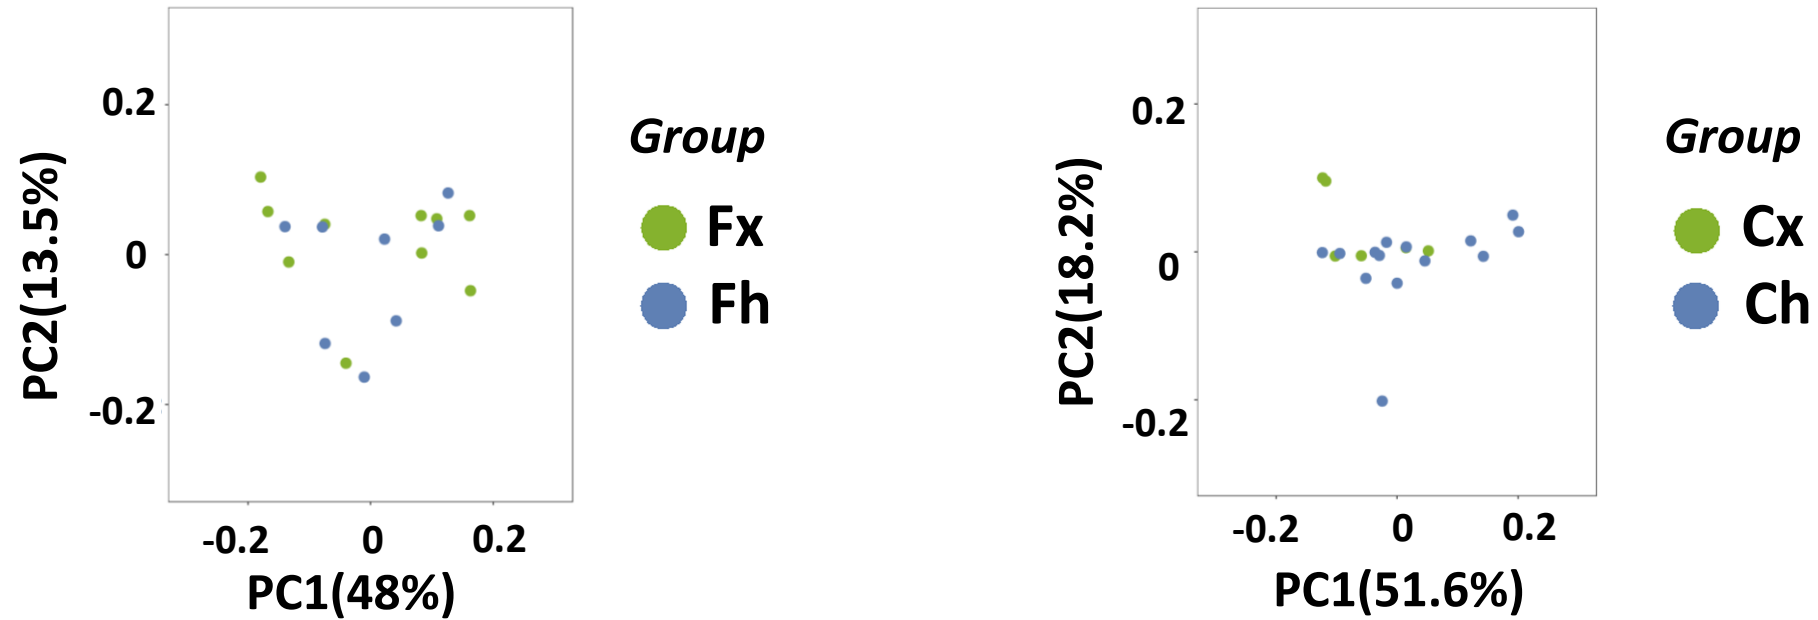

**Figure S2.**  $\alpha$  and  $\beta$  diversity of yaks in the same feeding style. (A) Shannon index of yaks from different farms; (B) Principal component analysis (PCoA) based on unweighted UniFrac distance shows the distribution between samples from different farms.
