# Supplementary material for: Intestinal Microbial Diversity of Free-Range and Captive Yak in Qinghai Province
Source: MDPI journal article supplement (doi:10.3390/microorganisms10040754), 2022-03-31
Supplement: s1 [file s1]

Table S1

Sample information of yaks.

| No. | Feeding style | Region                           | Sample ID | Antibiotic treatment |
|-----|---------------|----------------------------------|-----------|----------------------|
| 1   | Free-range    | Xinghai county, Qinghai province | XF1       | None                 |
| 2   | Free-range    | Xinghai county, Qinghai province | XF5       | None                 |
| 3   | Free-range    | Xinghai county, Qinghai province | XF8       | None                 |
| 4   | Free-range    | Xinghai county, Qinghai province | XF9       | None                 |
| 5   | Free-range    | Xinghai county, Qinghai province | XF3       | None                 |
| 6   | Free-range    | Xinghai county, Qinghai province | XF6       | None                 |
| 7   | Free-range    | Xinghai county, Qinghai province | XF7       | None                 |
| 8   | Free-range    | Xinghai county, Qinghai province | XF10      | None                 |
| 9   | Free-range    | Xinghai county, Qinghai province | XF11      | None                 |
| 10  | Free-range    | Xinghai county, Qinghai province | XF12      | None                 |
| 11  | Free-range    | Haiyan county, Qinghai province  | HF3       | None                 |
| 12  | Free-range    | Haiyan county, Qinghai province  | HF4       | None                 |
| 13  | Free-range    | Haiyan county, Qinghai province  | HF6       | None                 |
| 14  | Free-range    | Haiyan county, Qinghai province  | HF7       | None                 |
| 15  | Free-range    | Haiyan county, Qinghai province  | HF8       | None                 |
| 16  | Free-range    | Haiyan county, Qinghai province  | HF9       | None                 |
| 17  | Free-range    | Haiyan county, Qinghai province  | HF10      | None                 |
| 18  | Free-range    | Haiyan county, Qinghai province  | HF14      | None                 |
| 19  | Captive       | Xinghai county, Qinghai province | XS1       | None                 |
| 20  | Captive       | Xinghai county, Qinghai province | XS2       | None                 |
| 21  | Captive       | Xinghai county, Qinghai province | XS3       | None                 |
| 22  | Captive       | Xinghai county, Qinghai province | XS4       | None                 |
| 23  | Captive       | Xinghai county, Qinghai province | XS5       | None                 |
| 24  | Captive       | Xinghai county, Qinghai province | XS6       | None                 |
| 25  | Captive       | Haiyan county, Qinghai province  | HS1       | None                 |
| 26  | Captive       | Haiyan county, Qinghai province  | HS2       | None                 |
| 27  | Captive       | Haiyan county, Qinghai province  | HS3       | None                 |
| 28  | Captive       | Haiyan county, Qinghai province  | HS4       | None                 |
| 29  | Captive       | Haiyan county, Qinghai province  | HS12      | None                 |
| 30  | Captive       | Haiyan county, Qinghai province  | HS13      | None                 |
| 31  | Captive       | Haiyan county, Qinghai province  | HS14      | None                 |
| 32  | Captive       | Haiyan county, Qinghai province  | HS5       | None                 |
| 33  | Captive       | Haiyan county, Qinghai province  | HS6       | None                 |
| 34  | Captive       | Haiyan county, Qinghai province  | HS7       | None                 |
| 35  | Captive       | Haiyan county, Qinghai province  | HS8       | None                 |
| 36  | Captive       | Haiyan county, Qinghai province  | HS9       | None                 |
| 37  | Captive       | Haiyan county, Qinghai province  | HS10      | None                 |
| 38  | Captive       | Haiyan county, Qinghai province  | HS11      | None                 |

Table S2

Sequence information of the sample.

| No. | Sample | Raw reads           | Filtered reads | ASVs |
|-----|--------|---------------------|----------------|------|
| 1   | XF1    | 77293.7058954253*2  | 70490 *2       | 286  |
| 2   | XF5    | 76498.1266757765*2  | 70717 *2       | 240  |
| 3   | XF8    | 76083.3570507863*2  | 70094 *2       | 306  |
| 4   | XF9    | 70418.7475894779*2  | 68441 *2       | 506  |
| 5   | XF3    | 68335*2             | 65085 *2       | 944  |
| 6   | XF6    | 70021.4281543477*2  | 68309 *2       | 646  |
| 7   | XF7    | 75406.0307610242*2  | 70168 *2       | 311  |
| 8   | XF10   | 76389.802590253*2   | 70453 *2       | 307  |
| 9   | XF11   | 78025.6950488878*2  | 70976 *2       | 274  |
| 10  | XF12   | 82057.130 9571032*2 | 71920 *2       | 238  |
| 11  | XS1    | 70681.7036569505*2  | 68789 *2       | 356  |
| 12  | XS2    | 71050.9367783478*2  | 68763 *2       | 307  |
| 13  | XS3    | 71156.8953146654*2  | 68861 *2       | 419  |
| 14  | XS4    | 71038.4675398457*2  | 68630 *2       | 324  |
| 15  | XS5    | 71975.2082661832*2  | 69676 *2       | 428  |
| 16  | XS6    | 70368.5695892826*2  | 68406 *2       | 256  |
| 17  | HF3    | 71633*2             | 66059 *2       | 289  |
| 18  | HF4    | 70997.3809523809*2  | 68964 *2       | 593  |
| 19  | HF6    | 71106.9537752711*2  | 69105 *2       | 562  |
| 20  | HF7    | 71441.2792092682*2  | 69103 *2       | 623  |
| 21  | HF8    | 67026*2             | 60601 *2       | 293  |
| 22  | HF9    | 77123.3796726441*2  | 70760 *2       | 232  |
| 23  | HF10   | 69894.9599169218*2  | 68052 *2       | 457  |
| 24  | HF14   | 79222.872883566*2   | 70621 *2       | 230  |
| 25  | HS1    | 71362.447463706*2   | 69206 *2       | 343  |
| 26  | HS2    | 70353.3640264654*2  | 68253 *2       | 273  |
| 27  | HS3    | 70381.2170700929*2  | 68279 *2       | 395  |
| 28  | HS4    | 70703.0168663615*2  | 68468 *2       | 381  |
| 29  | HS12   | 70084.9546416625*2  | 68238 *2       | 380  |
| 30  | HS13   | 76856.9654539165*2  | 69880 *2       | 195  |
| 31  | HS14   | 70634.5509033215*2  | 68458 *2       | 425  |
| 32  | HS5    | 71273.8525777323*2  | 69360 *2       | 398  |
| 33  | HS6    | 70049.6185029864*2  | 68090 *2       | 313  |
| 34  | HS7    | 70462.75444186*2    | 68268 *2       | 173  |
| 35  | HS8    | 70241.9003517229*2  | 68293 *2       | 176  |
| 36  | HS9    | 70785.7853377523*2  | 68512 *2       | 298  |
| 37  | HS10   | 70415.7587655502*2  | 68038 *2       | 384  |
| 38  | HS11   | 69914.3900310164*2  | 68100 *2       | 243  |

Table S3

Microbial sequence diversity and richness index of Yaks in Xinghai County.

| Sample ID     | Shannon         | Simpson            | ACE                 | Chao1               |
|---------------|-----------------|--------------------|---------------------|---------------------|
| XF1           | 5.23            | 0.991              | 286.00              | 286.00              |
| XF5           | 4.70            | 0.976              | 240.32              | 240.00              |
| XF8           | 5.20            | 0.991              | 306.47              | 306.50              |
| XF9           | 5.60            | 0.994              | 506.16              | 506.00              |
| XF3           | 6.24            | 0.996              | 944.28              | 944.33              |
| XF5           | 5.97            | 0.995              | 646.14              | 646.00              |
| XF6           | 5.26            | 0.992              | 311.00              | 311.00              |
| XF7           | 5.28            | 0.992              | 307.00              | 307.00              |
| XF11          | 5.12            | 0.990              | 274.00              | 274.00              |
| XF12          | 4.92            | 0.987              | 238.00              | 238.00              |
| XS1           | 5.17            | 0.991              | 356.20              | 356.00              |
| XS2           | 4.76            | 0.979              | 307.00              | 307.00              |
| XS3           | 5.18            | 0.986              | 419.13              | 419.00              |
| XS4           | 5.15            | 0.991              | 324.00              | 324.00              |
| XS5           | 5.21            | 0.985              | 428.00              | 428.00              |
| XS6           | 4.53            | 0.971              | 256.00              | 256.00              |
| Mean $\pm$ SD | 5.22 $\pm$ 0.43 | 0.988 $\pm$ 0.0071 | 384.36 $\pm$ 184.09 | 384.30 $\pm$ 184.10 |

Table S4

Microbial sequence diversity and richness index of Yaks in Haiyan County.

| Sample ID     | Shannon         | Simpson            | ACE                 | Chao1               |
|---------------|-----------------|--------------------|---------------------|---------------------|
| HF3           | 5.20            | 0.991              | 289.00              | 289.00              |
| HF4           | 5.89            | 0.995              | 593.96              | 598.00              |
| HF6           | 5.93            | 0.996              | 562.96              | 567.00              |
| HF7           | 5.95            | 0.996              | 623.30              | 623.25              |
| HF8           | 5.12            | 0.990              | 293.63              | 293.50              |
| HF9           | 4.79            | 0.982              | 232.00              | 232.00              |
| HF10          | 5.54            | 0.994              | 457.15              | 457.00              |
| HF14          | 4.78            | 0.986              | 230.00              | 230.00              |
| HS1           | 4.87            | 0.980              | 343.00              | 343.00              |
| HS2           | 4.29            | 0.963              | 273.18              | 273.00              |
| HS3           | 5.03            | 0.977              | 395.00              | 395.00              |
| HS4           | 5.03            | 0.983              | 381.30              | 382.00              |
| HS5           | 5.07            | 0.983              | 380.00              | 380.00              |
| HS6           | 4.31            | 0.954              | 195.00              | 195.00              |
| HS7           | 5.34            | 0.990              | 425.00              | 425.00              |
| HS8           | 5.04            | 0.984              | 398.00              | 398.00              |
| HS9           | 3.74            | 0.834              | 313.00              | 313.00              |
| HS10          | 3.51            | 0.934              | 173.00              | 173.00              |
| HS11          | 3.59            | 0.939              | 177.75              | 177.50              |
| HS12          | 4.38            | 0.963              | 298.00              | 298.00              |
| HS13          | 5.14            | 0.985              | 384.15              | 384.00              |
| HS14          | 3.72            | 0.936              | 243.17              | 243.00              |
| Mean $\pm$ SD | 4.83 $\pm$ 0.73 | 0.970 $\pm$ 0.0360 | 348.25 $\pm$ 128.30 | 348.60 $\pm$ 129.02 |
